# Supplementary material for: Circulating HHIP Levels in Women with Insulin Resistance and PCOS: Effects of Physical Activity, Cold Stimulation and Anti-Diabetic Drug Therapy
Source: MDPI journal article supplement (doi:10.3390/jcm12030888), 2023-01-22
Supplement: s1 [file s1]

**Table S1.** Row mean scores differ and Cochran-Armitage trend analysis

| Model adjusted              | IR       |         | PCOS     |         |
|-----------------------------|----------|---------|----------|---------|
|                             | $\chi^2$ | P-value | $\chi^2$ | P-value |
| Row Mean Scores Test        | 126.8853 | 0.0001  | 85.3524  | 0.0001  |
| Cochran-Armitage Trend Test | -11.0927 | 0.0001  | -11.7486 | 0.0001  |

PCOS, polycystic ovary syndrome; IR, Insulin resistance; HHIP levels were cut-off, and adjusted for age, BMI, WHR, SBP, DBP and lipid profile.

**Table S2.** Main clinical and metabolic features pre-and post-treatment with anti-diabetes drug in PCOS women

|                          | Metformin (n = 45) |                      | GLP-1RA (n = 52)   |                      | TZDs (n = 40)      |                      |
|--------------------------|--------------------|----------------------|--------------------|----------------------|--------------------|----------------------|
|                          | Pre-treatment      | Post-treatment       | Pre-treatment      | Post-treatment       | Pre-treatment      | Post-treatment       |
| BMI (kg/m <sup>2</sup> ) | 24.4(22.4-26.9)    | 23.1(21.4-25.7)*     | 27.9(25.7-30.9)    | 25.5(23.6-28.6)**    | 23.4(21.8-25.9)    | 22.9(20.6-25.5)      |
| WHR                      | 0.86(0.80-0.89)    | 0.82(0.78-0.88)**    | 0.89(0.85-0.92)    | 0.86(0.81-0.89)**    | 0.86(0.80-0.90)    | 0.81(0.77-0.87)**    |
| SBP (mmHg)               | 112(104-120)       | 116(110-120)         | 118(111-123)       | 108(104-120)**       | 116(107-121)       | 112(105-119)         |
| DBP (mmHg)               | 72(68-80)          | 76(67-80)            | 72(67-80)          | 72(66-78)            | 69(64-77)          | 70(65-78)            |
| TG ( mmol/L)             | 1.30(1.06-1.87)    | 1.23(0.92-1.62)      | 1.94(1.50-2.50)    | 1.15(0.81-1.79)**    | 1.47(1.23-1.82)    | 1.18(1.01-1.68)      |
| TC ( mmol/L )            | 4.39(3.89-5.13)    | 4.18(3.79-4.69)**    | 4.71(4.18-5.35)    | 4.01(3.54-4.82)**    | 4.62(3.98-5.08)    | 4.15(3.65-4.65)**    |
| HDL-C(mmol/L)            | 1.19(1.04-1.35)    | 1.30(1.13-1.52)      | 1.09(0.98-1.26)    | 1.11(0.98-1.29)      | 1.17(1.03-1.35)    | 1.32(1.17-1.56)**    |
| LDL-C (mmol/L)           | 2.50(1.96-3.14)    | 2.10(1.82-2.66)**    | 2.74(2.20-3.28)    | 2.18(1.95-2.70)**    | 2.49(2.11-3.01)    | 2.25(1.76-2.59)**    |
| FFA (μmol/L)             | 0.53(0.44-0.68)    | 0.45(0.35-0.55)*     | 0.46(0.35-0.57)    | 0.38(0.27-0.45)**    | 0.52(0.39-0.79)    | 0.40(0.26-0.57)**    |
| FBG (mmol/L)             | 5.11(4.75-5.57)    | 5.07(4.62-5.29)*     | 5.38(5.16-5.78)    | 5.04(4.71-5.23)**    | 5.17(4.89-5.48)    | 4.94(4.75-5.35)**    |
| 2h-BG (mmol/L)           | 7.88(6.40-9.06)    | 6.34(5.71-7.17)**    | 8.29(7.28-10.10)   | 6.66(5.62-8.39)**    | 7.77(6.66-8.96)    | 6.79(5.77-8.37)**    |
| FIns (mU/L)              | 17.44(13.44-23.37) | 13.30(9.01-16.8)**   | 27.33(17.95-39.55) | 15.83(10.23-22.38)** | 14.00(10.34-19.50) | 10.64(6.73-13.55)**  |
| 2h-Ins (mU/L)            | 129.5(93.2-208.3)  | 96.2(56.8-133.9)**   | 176.4(128.9-337.2) | 108.3(73.1-173.4)**  | 138.3(99.2-229.8)  | 84.9(58.9-138.8)**   |
| HbA1c (%)                | 5.5(5.2-5.6)       | 5.3(5.0-5.5)**       | 5.6(5.3-5.9)       | 5.2(5.0-5.4)**       | 5.4(5.2-5.7)       | 5.3(5.05-5.5)**      |
| AUC <sub>g</sub>         | 15.9(14.1-19.0)    | 15.0(13.8-17.6)*     | 17.6(16.2-20.3)    | 14.9(13.3-17.3)**    | 17.2(15.7-18.9)    | 15.0(13.4-17.0)**    |
| AUC <sub>i</sub>         | 270.2(168.2-330.1) | 198.7(136.5-248.8)** | 351.7(236.5-519.0) | 274.1(183.3-391.0)** | 269.3(196.2-384.5) | 160.7(111.6-231.2)** |
| M-value (mg/kg/min)      | 4.77(4.06-6.02)    | 6.28(4.75-7.50)**    | 3.32(2.86-3.78)    | 4.43(3.63-6.20)**    | 5.21(4.08-5.97)    | 5.51(4.91-7.02)**    |
| HOMA-IR                  | 4.08(2.72-5.41)    | 2.86(1.88-4.06)**    | 6.54(4.41-9.78)    | 3.41(2.13-5.03)**    | 3.14(2.27-4.72)    | 2.33(1.52-3.13)**    |
| VAI                      | 2.09(1.53-2.94)    | 1.69(1.22-2.36)      | 3.22(2.05-4.64)    | 1.94(1.18-3.25)**    | 2.12(1.70-2.96)    | 1.68(1.11-2.53)*     |
| BAI                      | 29.8(26.9-31.8)    | 28.88(26.68-31.34)   | 32.8(30.3-35.4)    | 30.9(28.9-33.1)**    | 28.4(27.2-31.0)    | 28.2(26.7-31.4)      |

PCOS, polycystic ovary syndrome; IR, Insulin resistance; BMI, body mass index; WHR, waist-to-hip ratio; SBP, systolic blood pressure; DBP, diastolic blood pressure; TG, triglyceride; TC, total cholesterol; HDL-C, high-density lipoprotein cholesterol; LDL-C, low-density lipoprotein cholesterol; FFA, free fatty acids; FBG, fasting blood glucose; 2h-PBG, 2h-post-glucose load blood glucose; FIns, fasting plasma insulin; 2h-Ins, 2h-plasma insulin after glucose overload;  $AUC_g$ , the area under the curve for glucose;  $AUC_i$ , the area under the curve for insulin; HOMA-IR, HOMA-insulin resistance index; VAI, visceral adiposity index; BAI, body adiposity index; Values are given as median (Interquartile Range). \* $p < 0.05$ , \*\* $p < 0.01$  compared with baseline.

**Table S3.** Hormone and cytokine levels pre-and post-treatment with anti-diabetes drug in PCOS women

|                | Metformin          |                      | GLP-1RA            |                    | TZDs               |                    |
|----------------|--------------------|----------------------|--------------------|--------------------|--------------------|--------------------|
|                | (n = 45)           |                      | (n = 52)           |                    | (n = 40)           |                    |
|                | Pre-treatment      | Post-treatment       | Pre-treatment      | Post-treatment     | Pre-treatment      | Post-treatment     |
| DHEA-S (µg/dL) | 220.3(164.7-282.6) | 194.2(157.7-223.7)** | 247.2(164.4-361.8) | 274.0(140.1-360.7) | 251.1(172.8-315.2) | 243.8(174.3-301.0) |
| E2 (pg/mL)     | 49.0(31.7-64.8)    | 52.5(32.6-66.2)      | 41.1(31.7-50.6)    | 42.2(30.1-85.7)*   | 36.9(26.4-50.7)    | 52.2(37.5-110.5)*  |
| LH (IU/L)      | 6.50(3.61-11.53)   | 4.79(3.47-8.50)      | 7.06(4.79-10.13)   | 3.73(2.17-7.86)**  | 8.03(3.89-11.78)   | 5.47(3.28-7.60)    |
| FSH (IU/L)     | 7.20(5.72-8.97)    | 7.34(5.89-8.40)      | 5.82(4.73-6.73)    | 5.87(4.09-7.53)    | 6.00(5.52-6.62)    | 6.21(5.07-7.44)    |
| Prog (ng/mL)   | 1.84(1.20-2.44)    | 1.90(1.39-2.95)      | 1.49(0.89-2.27)    | 1.44(0.96-3.16)*   | 1.57(1.20-2.46)    | 1.88(1.43-2.75)    |
| SHBG (nmol/L)  | 32.1(22.3-43.2)    | 45.6(32.0-84.0)**    | 30.0(21.7-43.1)    | 37.2(20.5-55.3)    | 34.9(26.7-49.8)    | 54.1(42.0-74.9)**  |
| TEST (nmol/L ) | 2.30(1.83-2.92)    | 1.99(1.39-2.58)      | 1.94(1.31-2.22)    | 1.30(0.97-1.86)**  | 2.15(1.39-2.65)    | 1.55(1.14-1.80)**  |
| FAI            | 7.01(4.22-10.19)   | 3.75(2.47-6.67)**    | 6.27(3.59-9.12)    | 3.31(2.02-6.46)**  | 5.71(3.81-8.72)    | 2.72(1.80-4.24)**  |
| Adipoq (mg/L)  | 29.8(23.8-35.2)    | 38.5(29.1-47.4)**    | 25.9(22.4-33.2)    | 39.0(30.1-48.3)**  | 23.5(20.2-31.5)    | 37.2(27.9-44.6)**  |
| HHIP(µg/L)     | 14.7(11.4-17.3)    | 14.9(12.3-17.3)      | 15.3(11.9-18.3)    | 12.2(10.2-14.8)**  | 15.7(12.4-17.8)    | 13.0(10.4-16.4)*   |

DHEA-S: Dehydroepiandrosterone sulfate; E2, estradiol; LH, Luteinizing hormone; FSH, Follicle- stimulating hormone; Prog, Progesterone; SHBG, Sex-hormone binding globulin; TEST, testosterone; FAI, free androgen index = T(nmol/l)/SHBG (nmol/l) × 100. Adipoq, adiponectin. Values are given as median (Interquartile Range). \* $p < 0.05$ , \*\* $p < 0.01$  compared with baseline.
